# Supplementary material for: Biochemical indices, gene expression, and SNPs associated with salinity adaptation in juvenile chum salmon (Oncorhynchus keta) as determined by comparative transcriptome analysis
Source: PeerJ. 2022 Sep 12;10:e13585. doi: 10.7717/peerj.13585 (PMC9477081; doi:10.7717/peerj.13585)
Supplement: Supplemental Information 1 [file peerj-10-13585-s001.xlsx]

## Sheet: Fig. 1
		Na+/K+-ATP enzyme			U/mg protein
		D0	0.5567	0.5484	0.5013	0.3975	0.6186	0.5146
		D8	0.9347	0.8057	0.9679	0.9294	1.1934	0.9218
		D16	0.7264	1.1457	0.6843	0.6481	0.6259	1.0756
		D24	0.6187	0.5046	0.3428	0.3142	0.5567	0.6781
		Ca2+/Mg2+-ATP enzyme			U/mg protein
		D0	0.5632	0.5967	0.5357	0.5789	0.6034	0.4541
		D8	0.7768	0.8286	0.7143	0.7271	0.6493	0.7899
		D16	0.6237	0.8569	0.6037	0.5537	0.6112	0.7864
		D24	0.5246	0.5967	0.3967	0.3204	0.5964	0.5543

## Sheet: Fig. 2
Fig. 2a	SOD	U/mg protein
	D0	164.193	185.924	187.371	176.55	169.321	186.343
	D8	209.313	201.023	257.634	229.342	213.542	235.719
	D16	227.464	323.241	272.341	251.327	246.346	290.476
	D24	279.674	171.327	252.746	239.874	217.857	253.471
	GSH-PX	U/mg protein
	D0	3.9347	3.6241	4.7823	4.1527	3.764	4.5043
	D8	5.896	4.942	5.1204	5.3671	5.2647	5.4298
	D16	5.1742	5.3614	4.1129	4.758	4.6395	5.2268
	D24	4.3958	4.9417	4.032	4.4175	4.1324	4.7512
	CAT	U/mg protein
	D0	13.6379	10.478	9.9871	11.4218	10.3417	12.3695
	D8	15.7819	18.3981	16.4125	20.0143	16.8452	17.8436
	D16	14.9648	17.2798	11.2143	14.264	13.9641	14.214
	D24	12.683	13.172	16.9705	13.9684	13.1425	15.2604
Fig. 2b	ACP	U/mg protein
	D0	0.115694	0.128265	0.129395	0.121475	0.12045	0.126842
	D8	0.11367	0.12581	0.11841	0.120371	0.118634	0.12421
	D16	0.110684	0.124522	0.125527	0.12475	0.120258	0.12207
	D24	0.130275	0.10964	0.125742	0.11847	0.126324	0.11534
	AKP	U/mg protein
	D0	0.05243	0.0504128	0.04451	0.0456423	0.048156	0.048357
	D8	0.05978	0.0599643	0.0617462	0.05364	0.058043	0.05934
	D16	0.0614523	0.0586452	0.0612064	0.05995	0.05874	0.061457
	D24	0.0601423	0.0565482	0.0539842	0.0583412	0.05696	0.057813

## Sheet: Fig. 6
Fig. 6a			igf-1				igfbp-1a				igfbp-1b
	D0	0.852635	1.7411	0.678302		1.13288	0.737135	1.20581		0.742262	1.33793	1.01396
	D8	0.0338039	0.179659	0.206374		0.759611	1.19196	1.31343		0.058856	0.0596776	0.0484733
	D16	0.0476956	0.0379436	0.0532897		1.10957	1.14723	0.712025		1.30134	0.907519	0.668964
	D24	3.68075	3.94493	3.89062		1.40332	1.38511	1.06437		129.787	142.017	133.436
Fig. 6b			nmda1				nmda2b				nmda2c
	D0	0.978302	1.28343	1.1487		1.13396	0.965067	1.07177		1.0257	0.966896	1.18099
	D8	1.30435	1.30128	1.11987		4.70219	4.95897	5.70938		0.091717	0.085575	0.101766
	D16	0.812252	0.946058	0.768438		0.407856	0.395021	0.594603		0.31864	0.323088	0.363493
	D24	32.6724	32.7584	30.91		62.2226	62.2499	68.36		142.219	132.514	145.009
